# Supplementary material for: OBAMA: OBAMA for Bayesian amino-acid model averaging
Source: PeerJ journal article supplement (doi:10.7717/peerj.9460), 2020-08-04
Supplement: SupplementaryTables.pdf [file SupplementaryTables.pdf]

## 1 SUPPLEMENTARY TABLES

| True model:           | -   | +G  | +I  | +G+I | +F  | +G+F | +I+F | +G+I+F |
|-----------------------|-----|-----|-----|------|-----|------|------|--------|
| Model Indicator       | 100 | 98  | 99  | 98   | 99  | 100  | 100  | 98     |
| has Invariable Sites  | 100 | 99  | 100 | 100  | 100 | 98   | 100  | 100    |
| has Gamma Rates       | 100 | 96  | 98  | 96   | 100 | 97   | 99   | 100    |
| use External Freqs    | 100 | 100 | 100 | 100  | 100 | 100  | 98   | 98     |
| gamma Shape           | x   | 100 | x   | 93   | x   | 97   | x    | 91     |
| Proportion Invariable | x   | x   | 95  | 94   | x   | x    | 94   | 94     |
| Tree Height           | 96  | 93  | 91  | 94   | 100 | 94   | 98   | 97     |
| Yule Model            | 92  | 88  | 93  | 95   | 98  | 95   | 98   | 98     |
| birth Rate            | 93  | 92  | 92  | 92   | 93  | 92   | 92   | 93     |
| frequencies.1         | x   | x   | x   | x    | 94  | 94   | 91   | 91     |
| frequencies.2         | x   | x   | x   | x    | 93  | 96   | 97   | 95     |
| frequencies.3         | x   | x   | x   | x    | 92  | 90   | 91   | 90     |
| frequencies.4         | x   | x   | x   | x    | 94  | 94   | 94   | 92     |
| frequencies.5         | x   | x   | x   | x    | 93  | 97   | 94   | 93     |
| frequencies.6         | x   | x   | x   | x    | 93  | 90   | 94   | 95     |
| frequencies.7         | x   | x   | x   | x    | 93  | 97   | 95   | 97     |
| frequencies.8         | x   | x   | x   | x    | 94  | 98   | 93   | 96     |
| frequencies.9         | x   | x   | x   | x    | 93  | 98   | 95   | 90     |
| frequencies.10        | x   | x   | x   | x    | 91  | 92   | 92   | 92     |
| frequencies.11        | x   | x   | x   | x    | 98  | 91   | 93   | 92     |
| frequencies.12        | x   | x   | x   | x    | 91  | 97   | 94   | 95     |
| frequencies.13        | x   | x   | x   | x    | 94  | 92   | 93   | 93     |
| frequencies.14        | x   | x   | x   | x    | 95  | 94   | 90   | 94     |
| frequencies.15        | x   | x   | x   | x    | 97  | 96   | 96   | 96     |
| frequencies.16        | x   | x   | x   | x    | 94  | 94   | 95   | 91     |
| frequencies.17        | x   | x   | x   | x    | 99  | 99   | 94   | 94     |
| frequencies.18        | x   | x   | x   | x    | 97  | 93   | 95   | 93     |
| frequencies.19        | x   | x   | x   | x    | 94  | 95   | 89   | 94     |
| frequencies.20        | x   | x   | x   | x    | 96  | 92   | 93   | 96     |

**Table S1.** As Table 2 but for sequences with length 50 instead of 200, strict clock instead of relaxed clock to simulate data as well as doing inference.

| True model:           | -   | +G  | +I  | +G+I | +F  | +G+F | +I+F | +G+I+F |
|-----------------------|-----|-----|-----|------|-----|------|------|--------|
| Model Indicator       | 99  | 100 | 97  | 99   | 100 | 100  | 99   | 99     |
| has Invariable Sites  | 100 | 98  | 100 | 100  | 100 | 98   | 100  | 100    |
| has Gamma Rates       | 100 | 96  | 98  | 98   | 100 | 99   | 99   | 100    |
| use External Freqs    | 100 | 99  | 100 | 99   | 97  | 100  | 100  | 99     |
| gamma Shape           | x   | 96  | x   | 91   | x   | 94   | x    | 93     |
| Proportion Invariable | x   | x   | 95  | 96   | x   | x    | 97   | 98     |
| Tree Height           | 97  | 90  | 94  | 93   | 97  | 92   | 91   | 94     |
| Yule Model            | 99  | 91  | 94  | 92   | 97  | 96   | 98   | 95     |
| birth Rate            | 94  | 90  | 92  | 93   | 93  | 94   | 91   | 93     |
| uclDStdev             | 96  | 98  | 97  | 96   | 96  | 97   | 95   | 97     |
| frequencies.1         | x   | x   | x   | x    | 98  | 94   | 93   | 92     |
| frequencies.2         | x   | x   | x   | x    | 95  | 95   | 94   | 88     |
| frequencies.3         | x   | x   | x   | x    | 91  | 94   | 96   | 96     |
| frequencies.4         | x   | x   | x   | x    | 95  | 96   | 89   | 90     |
| frequencies.5         | x   | x   | x   | x    | 96  | 95   | 91   | 94     |
| frequencies.6         | x   | x   | x   | x    | 97  | 94   | 98   | 95     |
| frequencies.7         | x   | x   | x   | x    | 96  | 94   | 94   | 93     |
| frequencies.8         | x   | x   | x   | x    | 98  | 95   | 96   | 99     |
| frequencies.9         | x   | x   | x   | x    | 90  | 94   | 96   | 91     |
| frequencies.10        | x   | x   | x   | x    | 95  | 96   | 93   | 93     |
| frequencies.11        | x   | x   | x   | x    | 90  | 95   | 93   | 88     |
| frequencies.12        | x   | x   | x   | x    | 94  | 90   | 92   | 95     |
| frequencies.13        | x   | x   | x   | x    | 92  | 95   | 93   | 90     |
| frequencies.14        | x   | x   | x   | x    | 87  | 91   | 94   | 89     |
| frequencies.15        | x   | x   | x   | x    | 95  | 92   | 87   | 92     |
| frequencies.16        | x   | x   | x   | x    | 96  | 91   | 96   | 96     |
| frequencies.17        | x   | x   | x   | x    | 93  | 95   | 96   | 93     |
| frequencies.18        | x   | x   | x   | x    | 93  | 95   | 94   | 88     |
| frequencies.19        | x   | x   | x   | x    | 93  | 91   | 94   | 92     |
| frequencies.20        | x   | x   | x   | x    | 92  | 94   | 92   | 97     |

**Table S2.** As Table 2 but for sequences with length 50 instead of 200, strict clock instead of relaxed clock to simulate data, but relaxed clock to infer model.

| True model:           | -   | +G  | +I  | +G+I | +F  | +G+F | +I+F | +G+I+F |
|-----------------------|-----|-----|-----|------|-----|------|------|--------|
| Model Indicator       | 100 | 100 | 100 | 100  | 100 | 100  | 100  | 100    |
| has Invariable Sites  | 100 | 99  | 100 | 100  | 100 | 98   | 100  | 100    |
| has Gamma Rates       | 100 | 98  | 100 | 99   | 100 | 98   | 99   | 99     |
| use External Freqs    | 100 | 100 | 100 | 99   | 100 | 100  | 99   | 100    |
| gamma Shape           | x   | 96  | x   | 91   | x   | 94   | x    | 98     |
| Proportion Invariable | x   | x   | 91  | 96   | x   | x    | 97   | 94     |
| Tree Height           | 97  | 95  | 93  | 97   | 97  | 98   | 96   | 97     |
| Yule Model            | 96  | 93  | 94  | 95   | 96  | 100  | 98   | 94     |
| birth Rate            | 92  | 93  | 91  | 92   | 92  | 93   | 93   | 92     |
| uclDStdev             | 96  | 98  | 97  | 97   | 96  | 97   | 97   | 96     |
| frequencies.1         | x   | x   | x   | x    | 92  | 95   | 97   | 91     |
| frequencies.2         | x   | x   | x   | x    | 92  | 95   | 91   | 94     |
| frequencies.3         | x   | x   | x   | x    | 95  | 92   | 94   | 96     |
| frequencies.4         | x   | x   | x   | x    | 92  | 94   | 91   | 93     |
| frequencies.5         | x   | x   | x   | x    | 94  | 95   | 95   | 95     |
| frequencies.6         | x   | x   | x   | x    | 93  | 94   | 93   | 91     |
| frequencies.7         | x   | x   | x   | x    | 95  | 95   | 95   | 95     |
| frequencies.8         | x   | x   | x   | x    | 92  | 96   | 96   | 93     |
| frequencies.9         | x   | x   | x   | x    | 92  | 97   | 96   | 95     |
| frequencies.10        | x   | x   | x   | x    | 97  | 92   | 93   | 94     |
| frequencies.11        | x   | x   | x   | x    | 95  | 94   | 94   | 89     |
| frequencies.12        | x   | x   | x   | x    | 92  | 92   | 93   | 93     |
| frequencies.13        | x   | x   | x   | x    | 88  | 93   | 96   | 94     |
| frequencies.14        | x   | x   | x   | x    | 95  | 94   | 93   | 95     |
| frequencies.15        | x   | x   | x   | x    | 92  | 96   | 95   | 96     |
| frequencies.16        | x   | x   | x   | x    | 96  | 91   | 98   | 91     |
| frequencies.17        | x   | x   | x   | x    | 92  | 92   | 92   | 93     |
| frequencies.18        | x   | x   | x   | x    | 90  | 92   | 94   | 96     |
| frequencies.19        | x   | x   | x   | x    | 94  | 91   | 94   | 93     |
| frequencies.20        | x   | x   | x   | x    | 95  | 92   | 93   | 89     |

**Table S3.** As Table 2 but for sequences with length 50 instead of 200.

| True model:           | -   | +G  | +I  | +G+I | +F  | +G+F | +I+F | +G+I+F |
|-----------------------|-----|-----|-----|------|-----|------|------|--------|
| model indicator       | 100 | 99  | 100 | 100  | 100 | 100  | 100  | 100    |
| has invariable sites  | 100 | 98  | 98  | 100  | 100 | 97   | 100  | 100    |
| has gamma rates       | 100 | 98  | 99  | 97   | 100 | 99   | 99   | 99     |
| use external freqs    | 100 | 100 | 100 | 100  | 100 | 100  | 100  | 100    |
| gamma shape           | x   | 93  | x   | 91   | x   | 92   | x    | 95     |
| proportion invariable | x   | x   | 93  | 89   | x   | x    | 94   | 89     |
| tree height           | 94  | 91  | 90  | 96   | 91  | 92   | 94   | 94     |
| Yule model            | 93  | 90  | 93  | 97   | 93  | 94   | 96   | 95     |
| birth rate            | 92  | 93  | 92  | 92   | 93  | 92   | 92   | 92     |
| UCLD stdev            | 96  | 96  | 97  | 96   | 95  | 94   | 97   | 97     |
| frequencies.1         | x   | x   | x   | x    | 96  | 95   | 93   | 94     |
| frequencies.2         | x   | x   | x   | x    | 95  | 96   | 97   | 94     |
| frequencies.3         | x   | x   | x   | x    | 92  | 92   | 91   | 92     |
| frequencies.4         | x   | x   | x   | x    | 95  | 96   | 92   | 96     |
| frequencies.5         | x   | x   | x   | x    | 96  | 97   | 94   | 94     |
| frequencies.6         | x   | x   | x   | x    | 94  | 95   | 93   | 92     |
| frequencies.7         | x   | x   | x   | x    | 94  | 95   | 98   | 94     |
| frequencies.8         | x   | x   | x   | x    | 96  | 95   | 96   | 95     |
| frequencies.9         | x   | x   | x   | x    | 95  | 95   | 95   | 89     |
| frequencies.10        | x   | x   | x   | x    | 96  | 95   | 97   | 97     |
| frequencies.11        | x   | x   | x   | x    | 95  | 89   | 97   | 94     |
| frequencies.12        | x   | x   | x   | x    | 96  | 96   | 97   | 92     |
| frequencies.13        | x   | x   | x   | x    | 92  | 94   | 95   | 94     |
| frequencies.14        | x   | x   | x   | x    | 95  | 94   | 97   | 93     |
| frequencies.15        | x   | x   | x   | x    | 95  | 95   | 93   | 98     |
| frequencies.16        | x   | x   | x   | x    | 93  | 98   | 96   | 92     |
| frequencies.17        | x   | x   | x   | x    | 93  | 95   | 96   | 95     |
| frequencies.18        | x   | x   | x   | x    | 95  | 96   | 94   | 93     |
| frequencies.19        | x   | x   | x   | x    | 95  | 93   | 95   | 95     |
| frequencies.20        | x   | x   | x   | x    | 98  | 90   | 94   | 98     |

**Table S4.** As Table 2 but prior on gamma shape not truncated at 0.1.

| True model:           | -   | +G  | +I  | +G+I | +F  | +G+F | +I+F | +G+I+F |
|-----------------------|-----|-----|-----|------|-----|------|------|--------|
| Model Indicator       | 100 | 100 | 99  | 100  | 98  | 99   | 100  | 99     |
| has Invariable Sites  | 100 | 99  | 100 | 100  | 100 | 99   | 100  | 100    |
| has Gamma Rates       | 100 | 97  | 100 | 98   | 100 | 98   | 96   | 97     |
| use External Freqs    | 100 | 99  | 98  | 100  | 99  | 100  | 100  | 99     |
| gamma Shape           | x   | 98  | x   | 91   | x   | 97   | x    | 93     |
| Proportion Invariable | x   | x   | 93  | 92   | x   | x    | 95   | 93     |
| Tree Height           | 96  | 96  | 97  | 94   | 94  | 94   | 98   | 99     |
| Yule Model            | 90  | 95  | 92  | 91   | 94  | 95   | 99   | 96     |
| birth Rate            | 97  | 96  | 96  | 96   | 95  | 96   | 96   | 95     |
| uclDStdev             | 95  | 94  | 99  | 94   | 93  | 95   | 92   | 97     |
| frequencies.1         | x   | x   | x   | x    | 96  | 96   | 93   | 98     |
| frequencies.2         | x   | x   | x   | x    | 91  | 96   | 99   | 99     |
| frequencies.3         | x   | x   | x   | x    | 95  | 88   | 92   | 94     |
| frequencies.4         | x   | x   | x   | x    | 95  | 97   | 93   | 96     |
| frequencies.5         | x   | x   | x   | x    | 96  | 96   | 96   | 94     |
| frequencies.6         | x   | x   | x   | x    | 93  | 94   | 93   | 96     |
| frequencies.7         | x   | x   | x   | x    | 92  | 95   | 93   | 92     |
| frequencies.8         | x   | x   | x   | x    | 96  | 95   | 91   | 94     |
| frequencies.9         | x   | x   | x   | x    | 95  | 97   | 97   | 94     |
| frequencies.10        | x   | x   | x   | x    | 95  | 96   | 91   | 92     |
| frequencies.11        | x   | x   | x   | x    | 90  | 94   | 92   | 92     |
| frequencies.12        | x   | x   | x   | x    | 94  | 93   | 90   | 93     |
| frequencies.13        | x   | x   | x   | x    | 98  | 92   | 96   | 96     |
| frequencies.14        | x   | x   | x   | x    | 96  | 92   | 96   | 93     |
| frequencies.15        | x   | x   | x   | x    | 92  | 95   | 96   | 95     |
| frequencies.16        | x   | x   | x   | x    | 96  | 93   | 94   | 95     |
| frequencies.17        | x   | x   | x   | x    | 98  | 96   | 95   | 93     |
| frequencies.18        | x   | x   | x   | x    | 95  | 95   | 94   | 94     |
| frequencies.19        | x   | x   | x   | x    | 97  | 94   | 94   | 95     |
| frequencies.20        | x   | x   | x   | x    | 96  | 97   | 96   | 92     |

**Table S5.** As Table 2 but with sequences of length 50.
